# Supplementary material for: Maternal Separation Followed by Chronic Mild Stress in Adulthood Is Associated with Concerted Epigenetic Regulation of AP-1 Complex Genes
Source: MDPI journal article supplement (doi:10.3390/jpm11030209), 2021-03-16
Supplement: s1 [file s1]

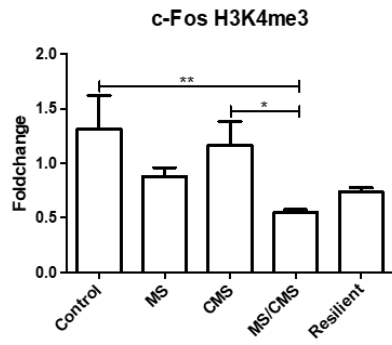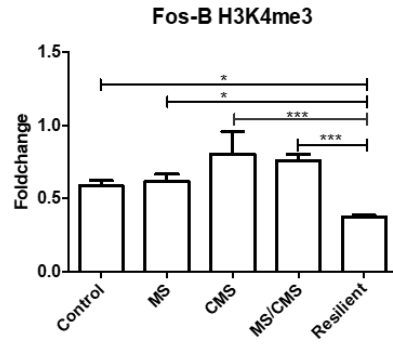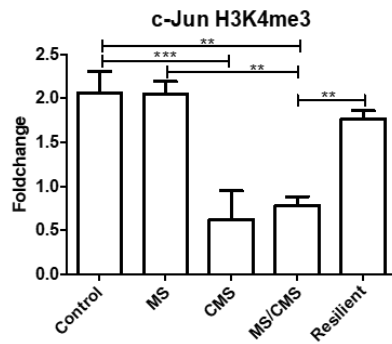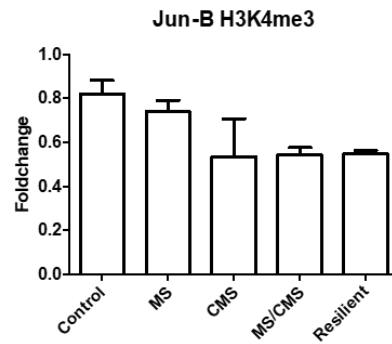

Association of histone H3 Lysine 4 trimethylation acetylation (H3K4me3) with different IEG promoters. MS- maternal separation, CMS- chronic mild stress, MS/CMS- chronic mild stress on the MS rats, Resilient- group of animals not exhibiting anhedonia after stress treatment. Results presented as fold change over control gene promoter (ActB). \* =  $p < 0.05$ , \*\* =  $p < 0.01$ , \*\*\* =  $p < 0.001$
